# Supplementary material
Source: Springer Nature journal article supplement (https://www.springermedizin.de/resource/supplementary/12984_2005_44_MOESM4_ESM.pdf/9605190)

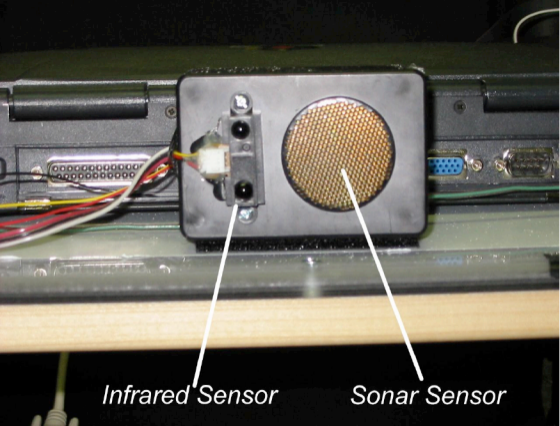

*Infrared Sensor*

*Sonar Sensor*

Supplement: MOESM4 [file 9605190]
